# Supplementary material for: Complex transcriptional control of the AZFa gene DDX3Y in human testis
Source: PubMed Central journal article supplement (PMC3039753; doi:10.1111/j.1365-2605.2010.01053.x), 2011-02
Supplement: ijan0034-0084-SD1.pdf [file ijan0034-0084-SD1.pdf]

**Fig. 1 supporting information Rauschendorf et al.**

Genomic sequence region of the human Y chromosome reference in the NCBI database (acc. no. NC\_000024; GRCh37) starting from position 15.014.702 upstream of the *MSY2* sequence block to position 15.016.892, the end of *DDX3Y* exon 1.

15.014.702 cagtgtagcagtgggcggtcatttacatgccaaaatacatatattttattataaataattcttt  
15.014.762 taattatataataaattaggtttgtagggccagaggggtgtcattgtgcatcatttgag  
15.014.822 tttattttctttgggaggcaagagagaggaaaggaaggtcaaaaatggagaaggccaata  
15.014.882 aatttattttatatacacgtgtgaatttaacttgagaatggtaaaggtgtcgacacaaaat  
15.014.882 atgttataaaaaaggaaatctagttgacaactttaacttgccaaagcagtaaaccaactt  
15.015.002 cactctgggaacactgaatagaaagtgtatgttccaatcactttgaaatgttttaatttta  
15.015.062 aattcggaaaagcagaaaatatttgtgataatgttttgagaatggaggtatttgaatttta  
15.015.122 gcactaggaaaccctttgaaggacgggtgtaaaatctggatatttaactctggtttcgctga  
15.015.182 gagttcagaggggaagaagtgtttgtaaaaccacgtatatggctattagttaaagccagga  
15.015.242 atctagtactaagctttttttttttttttttttttttttttttttctgcctgtctgctgaatctgg  
15.015.302 actagagggaggactgagaatttggccaaaaaaagtaactccttctagggcaaaagacta  
15.015.362 tttcccaccactgcagcgcctgtaagttgttacgaacgtaggacaactttgggtgtagtgtg  
15.015.422 gttccttcagtaggcccgatccccctcaaccctcattcttttgggcaaccaaagagctctt  
15.015.482 tcacaatcccatggctaggctggctttggggacgtagtatagcactggttaacctaggtt  
15.015.542 gcaggggtgccaga | aaaacaaggacctatgccagtgctgcttaagggcctaggtcccc **MSY2**  
15.015.602 ggtaggtgtgttatcaccagggtcattcagtatataattgtttcattgtttcgtg | aaaac  
15.015.662 aaggacctatgccagggtgcttaagggcctagggcctaggtcccctgtaggtgtgtta  
15.015.722 taatcaacgtcattcagtatgtaattgtttcattgtttcttcac | actatgccagggtgc  
15.015.782 gttaagggcctagggcctaggtcccctggtaggtgtgttatcatcaacgtcattcagtatg  
15.015.842 taattgtttcattgtttcttcac | actatgccagggtgcttaagggcctagggcctaggt  
15.015.902 cccctggtaggtgtgttatcatcaacgtcattcagtatgtaattgtttcattgtttcttc  
15.015.962 atcc | tgtgatgctaagccgtatgctcataaagcgcaggcacaccggtagaaaaactaga  
15.016.022 ggggtctggagttccctaggtgaaccccagcagcctaaccctgtcaagtctgtcgagcctc  
15.016.082 tggctggtcacacgtgctgcggaatccactcagctttcctcaggtgcagtcaggtccatc  
15.016.142 ctgcagagggaccttctgcggaacctgttctttcacctccctaacctgaagattgtattca  
15.016.202 aaccaccgtggatcgctcacgtaaaatggtcactgcgctaacacctgggatcccgtaac  
15.016.262 ccttatctatcttggcttcagagagttttttgactagttccaactttgctgaagcttgtc  
**end of exon-Ta at 5'-GTsplice site**  
15.016.322 aaagGTaggtgacggctagttggaacggaaaaattttacgaaacttctattctcagaag  
**end of exon-Tb at 5'-GTsplice site**  
15.016.382 taaaaggggaagagagagtgttaaggaagaaggggaagttgaggGTgggtaaggaggaggagc  
15.016.442 gggagttagtggttagattgtcactgtgtttaagatttcccccaaggcgaaaaaggcgaaaag  
15.016.502 atatcttctagatccctagaattcgaaggcattaggagagggcggggatagcaaacatc  
15.016.562 gcgcgaattttgagagggcgtgggactacgtaatcccgcgatcttatgactaaacgaacg

15.016.622 cgatttagggagagaagtaacggtagcgataaagggattgggtggtggtggtggaggggtgg  
 15.016.682 agccaacgattacgcacggttgtgcgtgctgctatagctgtgggaggggccatattacc  
**exon-1a after 3'-AG splice site**  
 15.016.742 gcgtaggctaaccagtgcgcttaat**AG**ctgtaggtccagtgtaagagttccgctattcgg  
**exon-1b after 3'-AG splice site**  
 15.016.802 tctcacacctacagtggaactaccgatttttcgcttctcttc**AG**gg**ATG**AGTCATGTGGT  
 15.016.862 GGTGAAAAATGACCCTGAACTGGACCAGCAG 15016892 **end of *DDX3Y* exon 1**

Sequence of *MSY2* repeats 1 to 4 (*MSY2-1* to *MSY2-4*) separated by “[”] is given with bold type letters. Location of the different MARP primer sequences listed in Table 1 of the supporting information (MARP1 to MARP4) are underlined in the corresponding Y reference positions. They were used for mapping the putative start of the testis specific *DDX3Y* testis transcript class in the second *MSY2* repeat by RT-PCR (Fig. 3a). Another transcriptional start site for five *DDX3Y* testis transcripts of the same class was mapped by the DBTSS database (<http://dbtss.hgc.jp>) downstream of *MSY2* at sequence position 15-016.018-15.016.019 (the corresponding dinucleotide “ta” is underlined and marked bold type).

The two different 5'-GT- splice donor and 3'-AG- splice acceptor sites given in boxed bold capital letters were identified by sequence analyses of the three exon-T splice variants, “Ta-1a”; “Ta-1b”; “Tb-1b”, as described in the main text. They mark the extension of exon-Ta and exon-Tb, respectively, the starts of exon-1a and exon-1b which are fused alternatively depending on the exon-T exon-1 splice event. The translational start codon “ATG” of the *DDX3Y* gene in exon 1 is marked bold type and italic. Begin of the *DDX3Y* open reading frame is given with capital letter code.
