# Supplementary material for: Complex transcriptional control of the AZFa gene DDX3Y in human testis
Source: PubMed Central journal article supplement (PMC3039753; doi:10.1111/j.1365-2605.2010.01053.x), 2011-02
Supplement: ijan0034-0084-SD2.pdf [file ijan0034-0084-SD2.pdf]

**Table 1 supporting information Rauschendorf et al.**

**List of oligonucleotides used as primer sets for the three RT-PCR assays described in this paper.**

The list is subdivided according to the three PCR assays which we designed for analysis of the distinct proximal and distal 5'UTR sequence extensions of the human *DDX3Y* transcripts. All forward primers (marked by appendix "for") were designed in and upstream of their 5'UTR sequences proposed by the 5'RACE experiments. The common reverse primer (marked by appendix "rev") in each PCR assay is bridging exon-2-3 to ensure the amplification of only the cDNAs of *DDX3Y* transcription products. Its location is given by its end position in exon-3. Besides the start positions of all forward primers in the BAC clone sequence, their positions in the current Y reference sequence (NC\_000024; GRCh37) are given as well. In the last column, presence (+) of the amplification product indicates that the forward primer used is proximal to the TSS analysed; absence (-) of the amplification product indicates that the forward primer used is distal of the TSS and therefore not present in the 5'UTR sequence of the analysed *DDX3Y* transcript.

| <b>Common TSS-I<br/>5'UTR extension<br/>assay</b> | <b>primer sequence</b>  | <b>BAC RP11-47511<br/>seq. start position</b> | <b>Y reference<br/>NC_000024<br/>seq. start position</b> | <b>RT-PCR assay<br/>"+" = present;<br/>"- " = absent</b> |
|---------------------------------------------------|-------------------------|-----------------------------------------------|----------------------------------------------------------|----------------------------------------------------------|
| 1261for                                           | TCATGTGGTGGTGAAAAATGAC  | 55150                                         | 15.016.853                                               | <b>+</b>                                                 |
| 2067for                                           | CATATTACCGCGTAGGCTAA    | 55031                                         | 15.016.733                                               | <b>+</b>                                                 |
| 2405for*                                          | TAGGGAGAAGTAACGGTAGC    | 54925                                         | 15.016.627                                               | <b>-</b>                                                 |
| 2389for                                           | CTACGTAATCCCGCGATCTTATG | 54885                                         | 15.016.587                                               | <b>-</b>                                                 |
| reverse primer                                    |                         |                                               |                                                          |                                                          |
| 1286rev                                           |                         | 59572                                         | 15.021.274                                               |                                                          |

\* this RT-PCR reaction was only positive for the testis RNA sample

| <b>MSY-repeat<br/>start assay</b> | <b>primer sequence</b> | <b>BAC RP11-47511<br/>seq. start position</b> | <b>Y reference<br/>NC_000024<br/>seq. start position</b> | <b>RT-PCR assay<br/>"+" = present;<br/>"- " = absent</b> |
|-----------------------------------|------------------------|-----------------------------------------------|----------------------------------------------------------|----------------------------------------------------------|
| MARP1for                          | CTGGCTTTGGGGACGTAGTA   | 53798                                         | 15.015.501                                               | <b>-</b>                                                 |
| MARP2for                          | AAAACAAGGGACCTATGCCAG  | 53854 + 53955                                 | 15.015.556<br>15.015.657                                 | <b>-</b>                                                 |
| MARP3for                          | TCACTATGCCAGGGTGCCTTAA | 54063 + 54162                                 | 15.015.765<br>15.015.864                                 | <b>+</b>                                                 |
| reverse primer                    |                        |                                               |                                                          |                                                          |
| MARP4rev                          |                        | 55187                                         | 15.016.889                                               |                                                          |

| <b>MSY2- 5'UTR<br/>proximal<br/>extension assay</b> | <b>primer sequence</b>  | <b>BAC RP11-47511<br/>seq. start position</b> | <b>Y reference<br/>NC_000024<br/>seq. start position</b> | <b>RT-PCR assay<br/>"+" = present;<br/>"- " = absent</b> |
|-----------------------------------------------------|-------------------------|-----------------------------------------------|----------------------------------------------------------|----------------------------------------------------------|
| 1726for                                             | CTGTGATGCTAAAGCCGATGAC  | 54263                                         | 15.015.965                                               | <b>+</b>                                                 |
| 1313for                                             | TCAAGTCTGTGCGAGCCTCTG   | 54362                                         | 15.016.064                                               | <b>+</b>                                                 |
| 1394for                                             | CGTAACCCCTTATCTATCTTGG  | 54554                                         | 15.016.256                                               | <b>+</b>                                                 |
| 2389for                                             | CTACGTAATCCCGCGATCTTATG | 54885                                         | 15.016.587                                               | <b>-</b>                                                 |
| reverse primer                                      |                         |                                               |                                                          |                                                          |
| 1286rev                                             | CCTTTGCTCGCTGTACTIONG   | 59572                                         | 15.021.274                                               |                                                          |
