# Supplementary material for: Complex transcriptional control of the AZFa gene DDX3Y in human testis
Source: PubMed Central journal article supplement (PMC3039753; doi:10.1111/j.1365-2605.2010.01053.x), 2011-02
Supplement: ijan0034-0084-SD3.pdf [file ijan0034-0084-SD3.pdf]

**Table 2 supporting information****Rauschendorf et al.**

Sequence positions and extensions of *MSY2-1* and *MSY2-2* repeat in the genomic BAC clones of the primates here listed by their species code given in the first column. Abbreviations used are: Hsap = Homo sapiens, Ptro = Pan troglodytes, Ppyg = Pongo pygmaeus, Mmul = Macaca mulatta, Cjac = Callithrix jacchus. No genomic BAC clone sequence is available for Pongo pygmaeus. This genomic sequence was isolated by PCR and deposited in the GenBank under the given accession number (Bao et al., 2000). The BAC clones identified are listed by their BAC-library and number code and GenBank accession number; The *MSY2* sequence polarity in the genomic clones is given by "+"= 5'-3' and "-"= 3'-5'.

| <b>primate species</b> | <b>BAC library and number code</b> | <b>GenBank accession no.</b> | <b><i>MSY2</i>-seq. polarity.</b> | <b><i>MSY2-1</i> position</b> | <b><i>MSY2-2</i> position</b> |
|------------------------|------------------------------------|------------------------------|-----------------------------------|-------------------------------|-------------------------------|
| Hsap                   | RP11-47511                         | AC004474                     | +                                 | 53854 – 53954                 | 53955 – 54064                 |
| Ptro                   | CH251-128L22                       | AC146254                     | -                                 | 60116 – 60016                 | 60015 – 59907                 |
| Ppyg                   | -----                              | AF207846                     | +                                 | 36 – 136                      | 137 – 240                     |
| Mmul                   | CH250-541A11                       | AC213321                     | -                                 | 84085 – 83985                 | 83984 – 83881                 |
| Cjac                   | CH259-161K20                       | AC225609                     | -                                 | 52656 – 52556                 | 52555 – 52460                 |
