# Supplementary material for: Complex transcriptional control of the AZFa gene DDX3Y in human testis
Source: PubMed Central journal article supplement (PMC3039753; doi:10.1111/j.1365-2605.2010.01053.x), 2011-02
Supplement: ijan0034-0084-SD4.pdf [file ijan0034-0084-SD4.pdf]

**Table 3 supporting information Rauschendorf et al.**

List of the species-specific oligonucleotides designed from genomic BAC sequences containing the homologous 5'UTR exon-T sequence upstream of the human and primates' *DDX3Y* gene (a genomic Y reference sequence is not yet published for the non-human primate species). The species-specific RT-PCR assays in the different primate tissues were performed with primer sets able to distinguish *DDX3Y* transcripts starting from the in human defined common "TSS-I region" or starting from the human "T-TSS-I" homologous region in exon-T (5'UTR exon-T extension-I), respectively, from the human "T-TSS-II" homologous region in *MSY2*. To distinguish putative 5'UTR exon-T extensions downstream of *MSY2* but extending beyond the putative "T-TSS-I" region, an additional primer set was designed in the homologous exon-T regions for a second exon-T RT-PCR assay, marked "5'UTR extension-II". Forward primers located at similar locations in the *MSY2* containing upstream region of the mouse *Ddx3y* gene were designed to include a comparative expression analysis for the mouse gene as an out group. The used homologous reverse primers always bridge the *DDX3Y* exon 2-3 sequence blocks.

| RT-PCR assay for:                                                 | species-specific primer seq.: | BAC code (with strand polarity): | BAC position: |
|-------------------------------------------------------------------|-------------------------------|----------------------------------|---------------|
| <b>TSS-I:</b>                                                     |                               |                                  |               |
| Homo sapiens (Hsap)                                               | CATATTACCGCGTAGGCTAA          | RP11-475I1 (plus strand)         | 55031         |
| Pan troglodytes (Ptro)                                            | CATATTACCGCGTAGGTTAAGC        | CH251-128L22 (minus strand)      | 59139         |
| Macaca mulatta (Mmul)                                             | CATATTACCGCGTAGGCTAA          | CH250-541A11 (minus strand)      | 83107         |
| Callithrix jacchus (Cjac)                                         | GCCATTTTAAGACGGAGTCTAAG       | CH259-161K20 (minus strand)      | 51750         |
| Mus musculus (Mmus)                                               | ACTCGTCAGTACGTTTGGG           | RP24-208N6 (minus strand)        | 93858         |
| <b>T-TSS-I<br/>5'UTR exon-T extension-I:</b>                      |                               |                                  |               |
| Homo sapiens (Hsap)                                               | TCAAGCTGTGCGAGCCTCTG          | RP11-475I1 (plus strand)         | 54362         |
| Pan troglodytes (Ptro)                                            | TCAAGCCTGTGCGAGCCTCTG         | CH251-128L22 (minus strand)      | 59807         |
| Macaca mulatta (Mmul)                                             | TCAAGCCTGTGCGAGCTTGTG         | CH250-541A11 (minus strand)      | 83781         |
| Callithrix jacchus (Cjac)                                         | TCAAGCCCGTAAAGTATCTGG         | CH259-161K20 (minus strand)      | 52360         |
| Mus musculus (Mmus)                                               | TAGAATAGTTCAGCAGAGACTAC       | RP24-208N6 (minus strand)        | 94231         |
| <b>T-TSS-II (in <i>MSY2</i>):</b>                                 |                               |                                  |               |
| Homo sapiens (Hsap)                                               | CTATGCCAGGGTGCCTTAAGG         | RP11-475I1 (plus strand)         | 54165         |
| Pan troglodytes (Ptro)                                            | CTATGCCAGGGTGCCTTAAGG         | CH251-128L22 (minus strand)      | 60003         |
| Macaca mulatta (Mmul)                                             | CTATGCCAGTGTTCGTTAAGG         | CH250-541A11 (minus strand)      | 83972         |
| Callithrix jacchus (Cjac)                                         | CTCAGGTAGTGTGTGTTAAGG         | CH259-161K20 (minus strand)      | 52543         |
| Mus musculus (Mmus)                                               | CTACCTGAAATGTACAAAGTG         | RP24-208N6 (minus strand)        | 94561         |
| <b>5'UTR exon-T extension-II<br/>(downstream of <i>MSY2</i>):</b> |                               |                                  |               |
| Homo sapiens (Hsap)                                               | CTGTGATGCTAAAGCCGTATGC        | RP11-475I1 (plus strand)         | 54263         |
| Pan troglodytes (Ptro)                                            | CTGTGATGCTAAAGCCGTATGC        | CH251-128L22 (minus strand)      | 59906         |
| Macaca mulatta (Mmul)                                             | CTGTGATGCTAAAGCCGTATGC        | CH250-541A11 (minus strand)      | 83880         |
| Callithrix jacchus (Cjac)                                         | CTGTGACGCTAAGGTCGTATGC        | CH259-161K20 (minus strand)      | 52459         |
| Mus musculus (Mmus)                                               | CTGAAACTCCCTACTATCACTTG       | RP24-208N6 (minus strand)        | 94493         |
| <b>reverse primer: exon 2-3</b>                                   |                               |                                  |               |
| Homo sapiens (Hsap)                                               | CCTTTGCTCGCTGTA CT TGC        | RP11-475I1 (plus strand)         | 57788         |
| Pan troglodytes (Ptro)                                            | CCTTTGCTCGCTCTACTTGC          | CH251-128L22 (minus strand)      | 56363         |
| Macaca mulatta (Mmul)                                             | CCTTTGCTCGCTGTA CT TGC        | CH250-541A11 (minus strand)      | 80367         |
| Callithrix jacchus (Cjac)                                         | CGTCCTTTGCTTGCTGTA CT TGC     | CH259-161K20 (minus strand)      | 49060         |
| Mus musculus (Mmus)                                               | CCTTTGCTCTCTGTATTTCC          | RP24-208N6 (minus strand)        | 91558         |
